# Supplementary material for: A multi-themed and multi-format intervention program for improving dementia literacy among Chinese older adults: Study protocol for a non-randomized controlled trial
Source: Research Square preprint supplement (doi:10.21203/rs.3.rs-4199561/v1), 2024-04-12
Supplement: Supplementary file 1 [file b5601e53eb22ee92c6b87306.docx]

| **Session** | **Theme** | **Objective** | **Content** | **Method** |
| --- | --- | --- | --- | --- |
| First | Understanding Dementia Properly | Improving Dementia Knowledge Literacy | - What is dementia? - Breaking the traditional misconceptions about dementia - Understanding concepts closely related to dementia - Recognizing the importance of an accurate understanding of dementia | 1. Community health seminar 2. Popular science videos 3. WeChat group information push and question-answering |
| Second | Gaining In-Depth Understanding of Dementia | Strengthening the Enhancement of Dementia Knowledge Literacy | - Different classifications and causes of dementia - The relationship between Alzheimer’s disease and dementia - Accepting the reality that dementia is incurable - Sharing dementia knowledge with others | a) Community health seminar  b) Popular science videos  c) WeChat group information push and question-answering |
| Third | How to Prevent and Identify Dementia | Enhancing Self-Management Behavior Literacy for Dementia Prevention | - How to prevent dementia in your daily life - Things you must avoid to prevent dementia - How to identify dementia early | a) Community health seminar  b) Popular science videos  c) WeChat group information push and question-answering |
| Fourth | How to Diagnose, Treat and Manage Dementia | Enhancing Self-Management Behavior Literacy for Dementia Treatment | - How to seek diagnosis and treatment help for dementia - How to treat dementia - How to slow down the further deterioration of dementia | a) Community health seminar  b) Popular science videos  c) WeChat group information push and question-answering |
| Fifth | Living Well with Dementia | Enhancing Attitude Literacy Toward Self with Dementia | - Preventing Panic and Anxiety, Confronting Dementia Positively - How to live well with dementia - People with dementia are still full of love | a) Community health seminar  b) Popular science videos  c) WeChat group information push and question-answering |
| Sixth | How to be Friendly with People Who Have Dementia | Enhancing Attitude Literacy Toward Others with Dementia | - Understanding the “peculiar” behavior of people with dementia - Viewing people with dementia without discrimination - Sharing stories of dementia around you - Recognizing the unique and independent nature of individuals with dementia | a) Community health seminar  b) Popular science videos  c) WeChat group information push and question-answering |

Table 1 Main contents and arrangements of dementia literacy interventions for older adults
